# Supplementary material for: Cooperative tin oxide fullerene electron selective layers for high-performance planar perovskite solar cells
Source: Royal Society of Chemistry journal article supplement (doi:10.1039/c6ta05095f), 2016-01-01
Supplement: c6ta05095f1.pdf [file c6ta05095f1.pdf]

## Electronic supplementary information

### Cooperative tin oxide fullerene electron selective layers for high-performance planar perovskite solar cells

Weijun Ke,<sup>abc</sup> Dewei Zhao,<sup>a</sup> Chuanxiao Xiao,<sup>c</sup> Changlei Wang,<sup>a</sup> Alexander J. Cimaroli,<sup>a</sup> Corey R. Grice,<sup>a</sup> Mengjin Yang,<sup>c</sup> Zhen Li,<sup>c</sup> Chun-Sheng Jiang,<sup>c</sup> Mowafak Al-Jassim,<sup>c</sup> Kai Zhu,<sup>c</sup> Mercouri G. Kanatzidis,<sup>d</sup> Guojia Fang<sup>\*b</sup> and Yanfa Yan<sup>\*a</sup>

<sup>a</sup>Department of Physics and Astronomy and Wright Center for Photovoltaics Innovation and Commercialization, The University of Toledo, Toledo, OH 43606, USA. E-mail: yanfa.yan@utoledo.edu

<sup>b</sup>Key Laboratory of Artificial Micro- and Nano-structures of Ministry of Education of China, School of Physics and Technology, Wuhan University, Wuhan 430072, China. E-mail: gjfang@whu.edu.cn

<sup>c</sup>National Renewable Energy Laboratory, 15013 Denver West Parkway, Golden, CO 80401, USA

<sup>d</sup>Department of Chemistry, Northwestern University, Evanston, IL 60208, USA

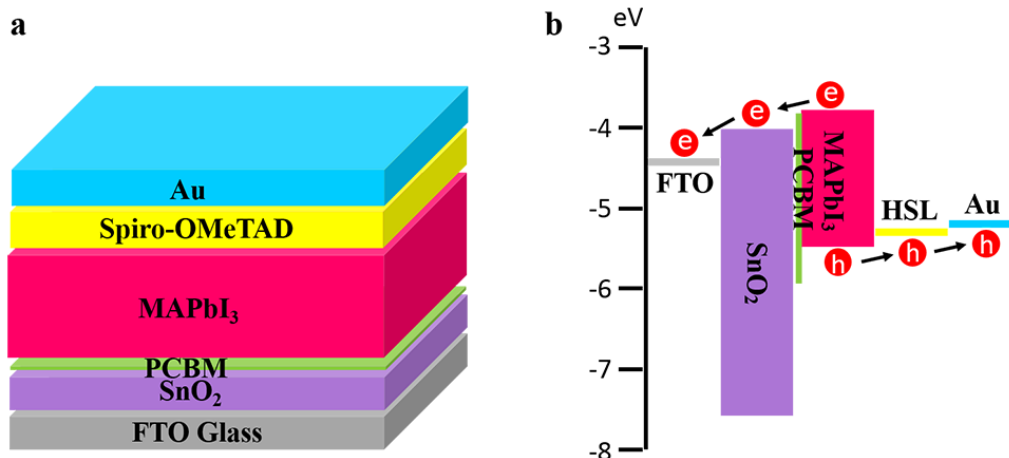

**Fig. S1** (a) Schematic view and (b) energy band diagram of a planar perovskite solar cell using a SnO<sub>2</sub>/PCBM ESL.

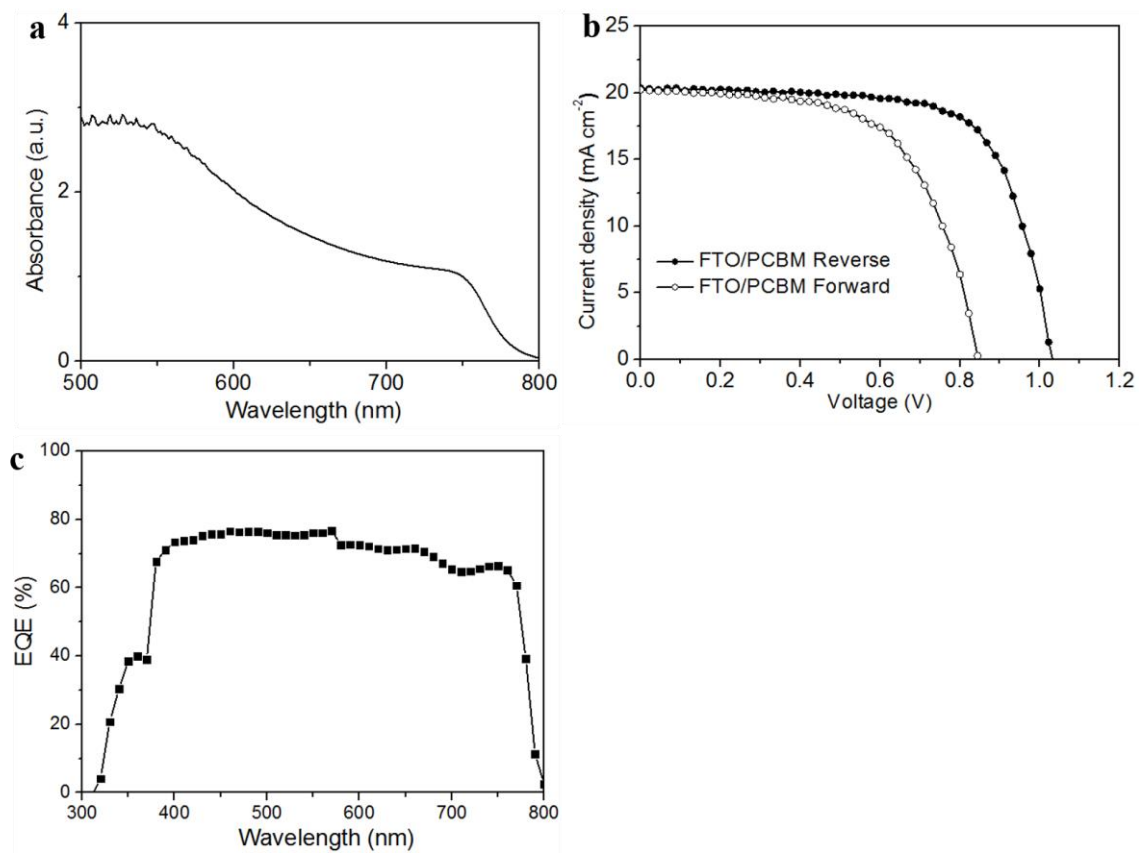

**Fig. S2** (a) UV-vis absorbance spectrum, (b)  $J$ - $V$  curves, and (c) EQE spectrum of a perovskite solar cell using a PCBM ESL.

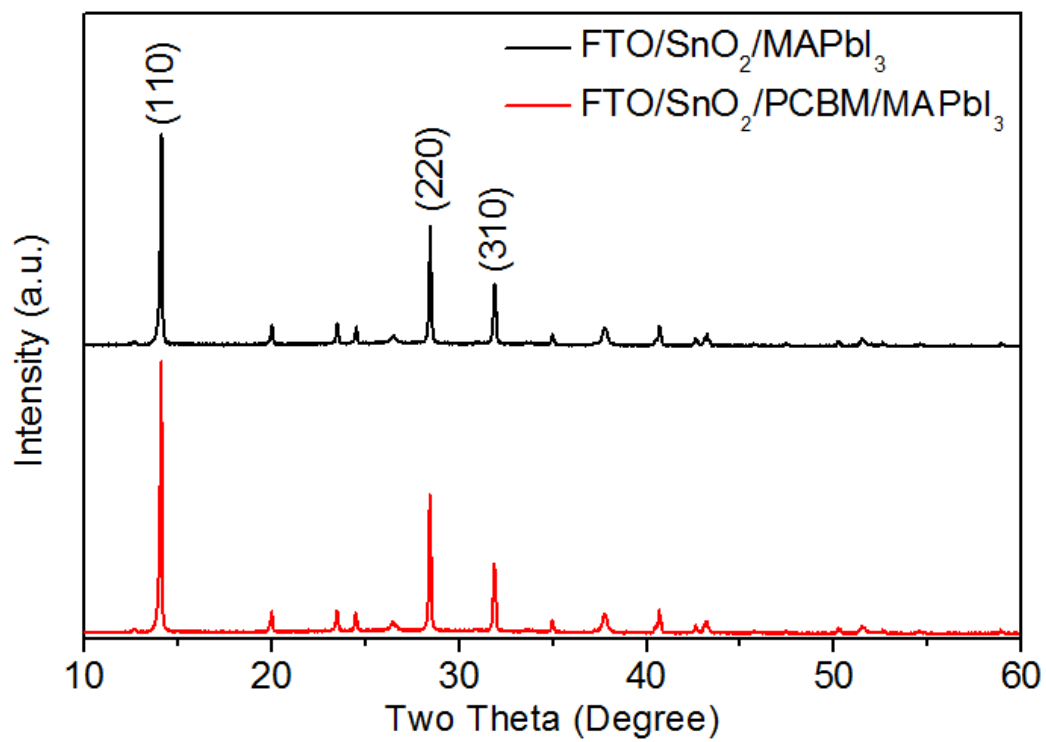

**Fig. S3** XRD patterns of perovskite films grown on SnO<sub>2</sub> and SnO<sub>2</sub>/PCBM ESLs.

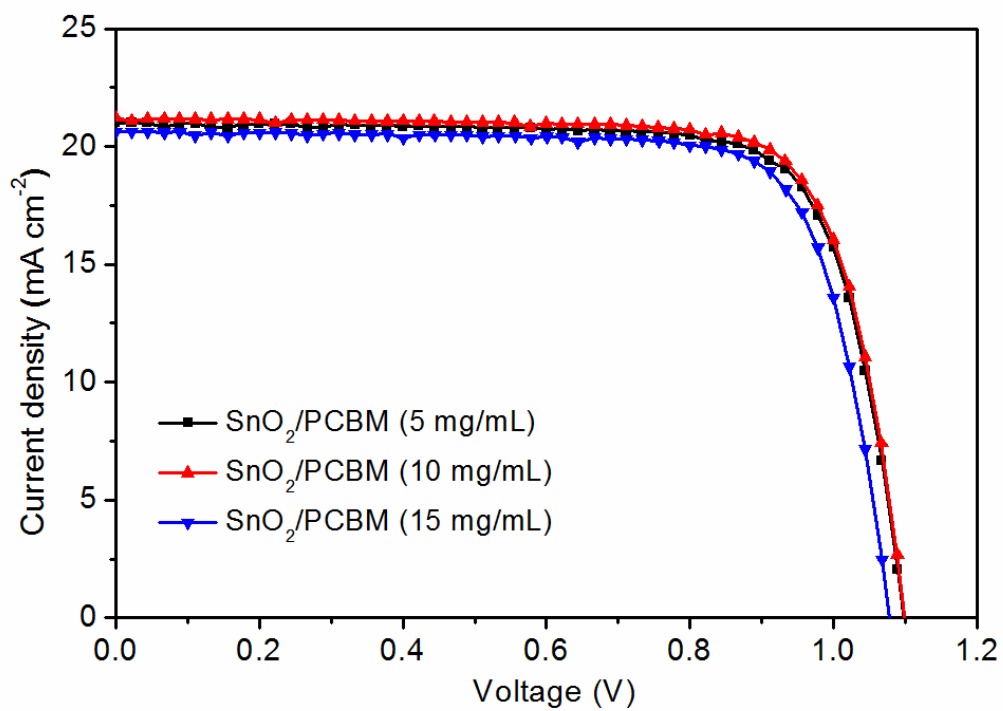

**Fig. S4** (a) *J-V* curves of the cells using SnO<sub>2</sub>/PCBM ESLs with PCBM films prepared by the precursors containing 5, 10, and 15 mg/mL PCBM in dichlorobenzene solutions measured under reverse voltage scanning.

**Table S1** Summary of the photovoltaic parameters of the cells using SnO<sub>2</sub>/PCBM ESLs with PCBM films prepared by different PCBM concentrations in dichlorobenzene solutions measured under reverse voltage scanning.

| PCBM Concentration<br>[mg/mL] | $V_{oc}$<br>[V] | $J_{sc}$<br>[mA cm <sup>-2</sup> ] | FF<br>[%] | PCE<br>[%] |
|-------------------------------|-----------------|------------------------------------|-----------|------------|
| 5                             | 1.10            | 21.00                              | 77.11     | 17.77      |
| 10                            | 1.10            | 21.22                              | 77.52     | 18.08      |
| 15                            | 1.08            | 20.63                              | 77.65     | 17.26      |

**Table S2** Values for TRPL characteristics of perovskite films deposited on SnO<sub>2</sub> and SnO<sub>2</sub>/PCBM ESLs.

|                            | $\tau_1$ | Ratio | $\tau_2$ | Ratio |
|----------------------------|----------|-------|----------|-------|
|                            | [ns]     | [%]   | [ns]     | [%]   |
| SnO <sub>2</sub> ESL       | 0.07     | 93.77 | 0.83     | 6.23  |
| SnO <sub>2</sub> /PCBM ESL | 0.06     | 95.46 | 0.33     | 4.54  |

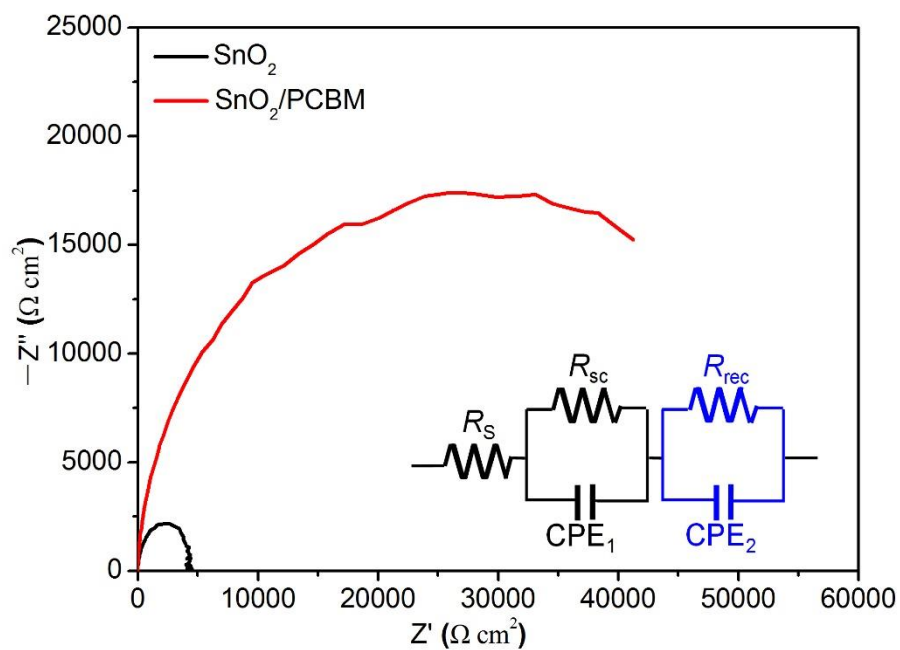

**Fig. S5** Nyquist plots of the cells using unpassivated SnO<sub>2</sub> and SnO<sub>2</sub>/PCBM ESLs.

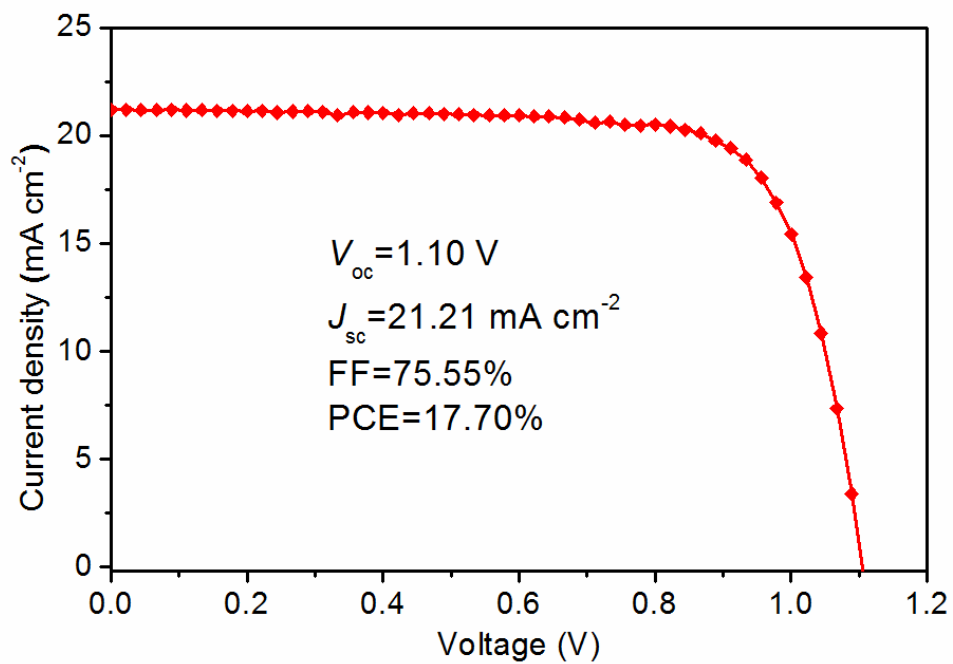

**Fig. S6** *J-V* curve of the planar perovskite solar cell using a  $\text{SnO}_2$  ESL with a 5 nm thick  $\text{C}_{60}$  film measured under reverse voltage scanning.
